# Supplementary material for: Self-trapped exciton emission in an Sn(ii)-doped all-inorganic zero-dimensional zinc halide perovskite variant
Source: Royal Society of Chemistry journal article supplement (doi:10.1039/d1nr04635g), 2021-01-01
Supplement: d1nr04635g1.pdf [file d1nr04635g1.pdf]

## Supporting Information

# Self-Trapped Exciton Emission in Sn(II)-Doped All-Inorganic Zero-Dimensional Zinc Halide Perovskite Variant

*Xiaoyu Wang,<sup>a</sup> Qibin Shen,<sup>a</sup> Yansong Chen,<sup>a</sup> Nasir Ali,<sup>a</sup> Ziyang Ren,<sup>a</sup> Gang Bi,<sup>b\*</sup> and*

*Huizhen Wu<sup>a\*</sup>*

Affiliations:

<sup>a</sup>Zhejiang Province Key Laboratory of Quantum Technology and Devices and

Department of Physics, State Key Laboratory of Silicon Materials, Zhejiang

University, Hangzhou, 310027, PR China

<sup>b</sup>School of Information & Electrical Engineering, Zhejiang University City College,

Hangzhou, Zhejiang 310015, PR China

\*Corresponding Author: big@zucc.edu.cn; hzwu@zju.edu.cn

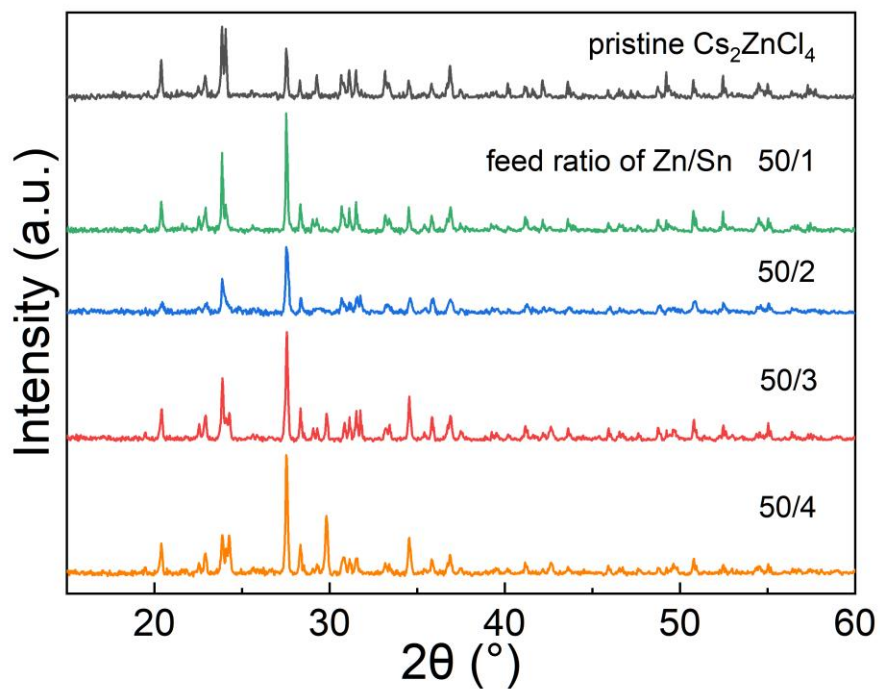

Figure S1. PXR D patterns of the pristine and Sn(II)-doped  $\text{Cs}_2\text{ZnCl}_4$  with different Zn/Sn feed ratio in synthesis.

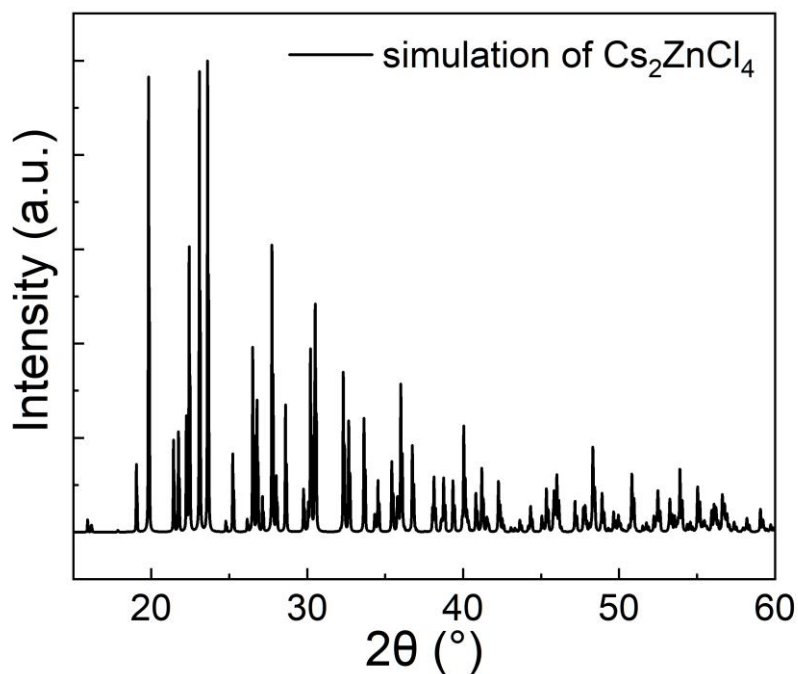

Figure S2. Simulated PXR D patterns of the pristine  $\text{Cs}_2\text{ZnCl}_4$ .

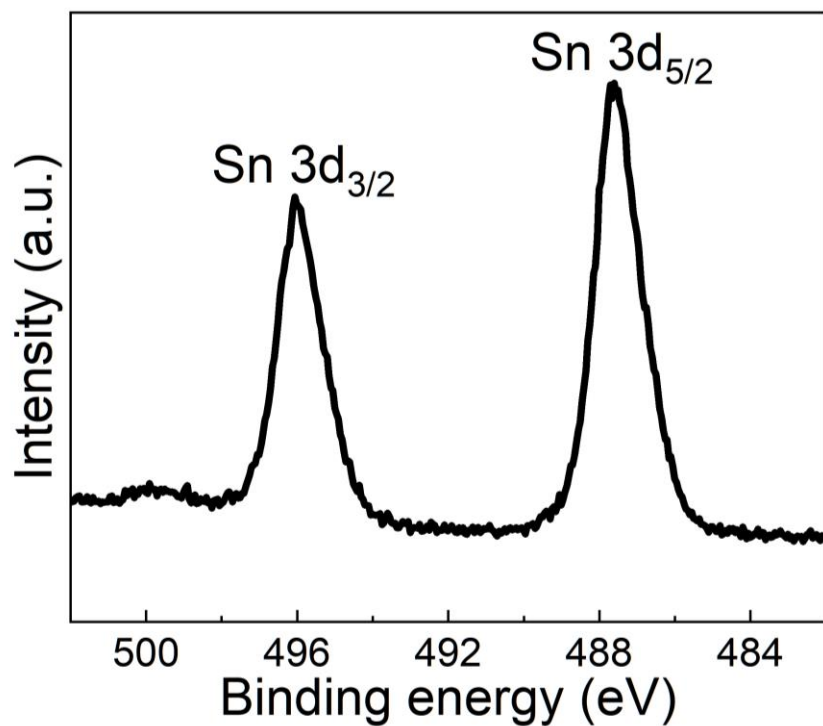

Figure S3. The high-resolution XPS spectrum of Sn 3d of the Sn(II)-doped  $\text{Cs}_2\text{ZnCl}_4$ .

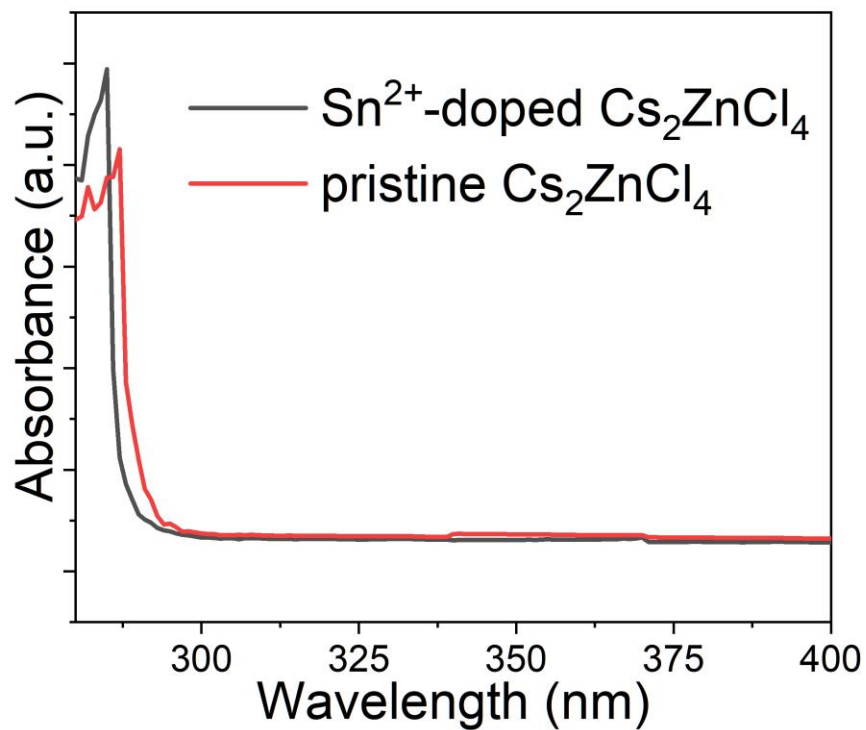

Figure S4. Absorption spectra for the pristine and Sn(II)-doped  $\text{Cs}_2\text{ZnCl}_4$  crystals.

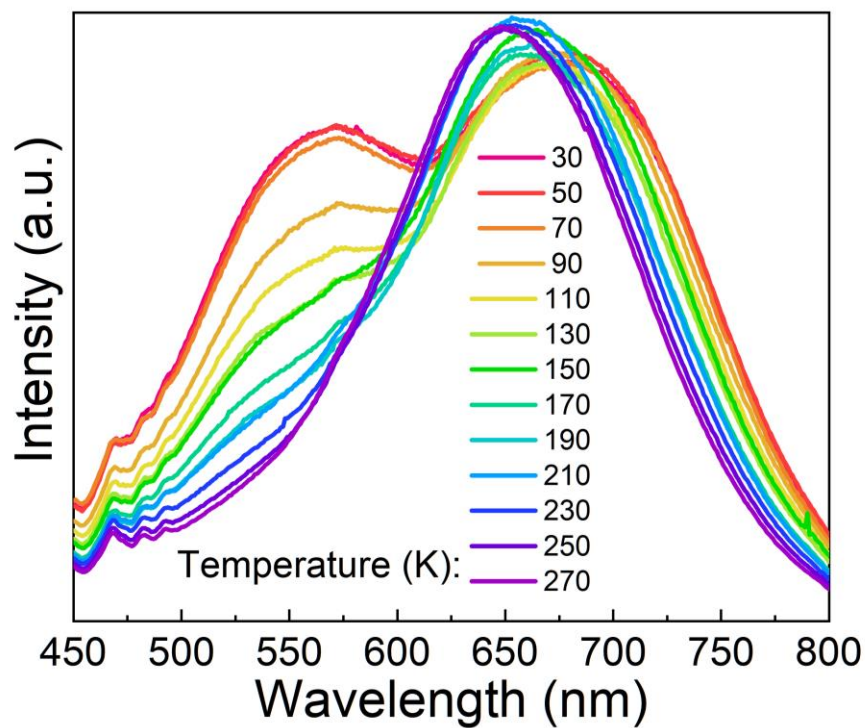

Figure S5. Temperature-dependent PL spectra of the Sn(II)-doped  $\text{Cs}_2\text{ZnCl}_4$ . The temperature change interval is 20 K.

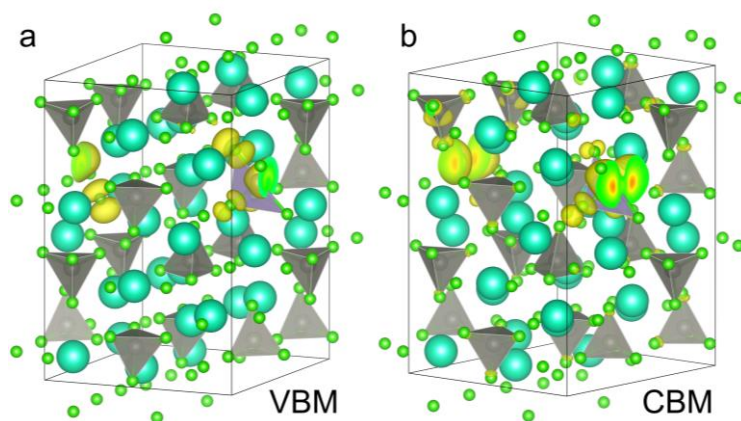

Figure S6. Partial charge densities of (a) VBM and (b) CBM at respective atomic sites for the Sn(II)-doped  $\text{Cs}_2\text{ZnCl}_4$ .
